# Supplementary material for: Influence of Lyophilization and Cryoprotection on the Stability and Morphology of Drug-Loaded Poly(ethylene glycol-b-ε-caprolactone) Micelles
Source: MDPI journal article supplement (doi:10.3390/polym15081974), 2023-04-21
Supplement: s1 [file s1]

Supplementary Information

# Influence of Lyophilization and Cryoprotection on the Stability and Morphology of Drug-Loaded Poly(Ethylene Glycol-*b*- $\epsilon$ -caprolactone) Micelles

**Table S1.** Concentration and volume of stock solutions combined to prepare copolymer solutions in ultrapure water for the determination of the CAC of PEG-*b*-PCL block copolymer micelles.

| Conc. of copolymer in PBS (mg/L) <sup>a</sup> | Volume of pyrene stock solution ( $\mu$ L) <sup>b</sup> | Conc. of copolymer stock solution (mg/L) <sup>c</sup> | Volume of copolymer stock solution ( $\mu$ L) | Volume of ultrapure water added ( $\mu$ L) |
|-----------------------------------------------|---------------------------------------------------------|-------------------------------------------------------|-----------------------------------------------|--------------------------------------------|
| 500                                           | 20                                                      | 2000                                                  | 500                                           | 2000                                       |
| 100                                           | 20                                                      | 2000                                                  | 100                                           | 2000                                       |
| 50.0                                          | 20                                                      | 1000                                                  | 100                                           | 2000                                       |
| 10.0                                          | 20                                                      | 1000                                                  | 20                                            | 2000                                       |
| 5.00                                          | 20                                                      | 1000                                                  | 10                                            | 2000                                       |
| 2.50                                          | 20                                                      | 100                                                   | 50                                            | 2000                                       |
| 1.00                                          | 20                                                      | 100                                                   | 20                                            | 2000                                       |
| 0.75                                          | 20                                                      | 100                                                   | 15                                            | 2000                                       |
| 0.50                                          | 20                                                      | 100                                                   | 10                                            | 2000                                       |
| 0.25                                          | 20                                                      | 10                                                    | 50                                            | 2000                                       |

<sup>a</sup> Copolymer solutions were prepared in high purity water *via* the solvent evaporation approach with a constant pyrene concentration of  $6 \times 10^{-7}$  M. <sup>b</sup> A  $6 \times 10^{-5}$  M pyrene stock solution in acetone was used to prepare all solutions. <sup>c</sup> All stock solutions were prepared in acetone.

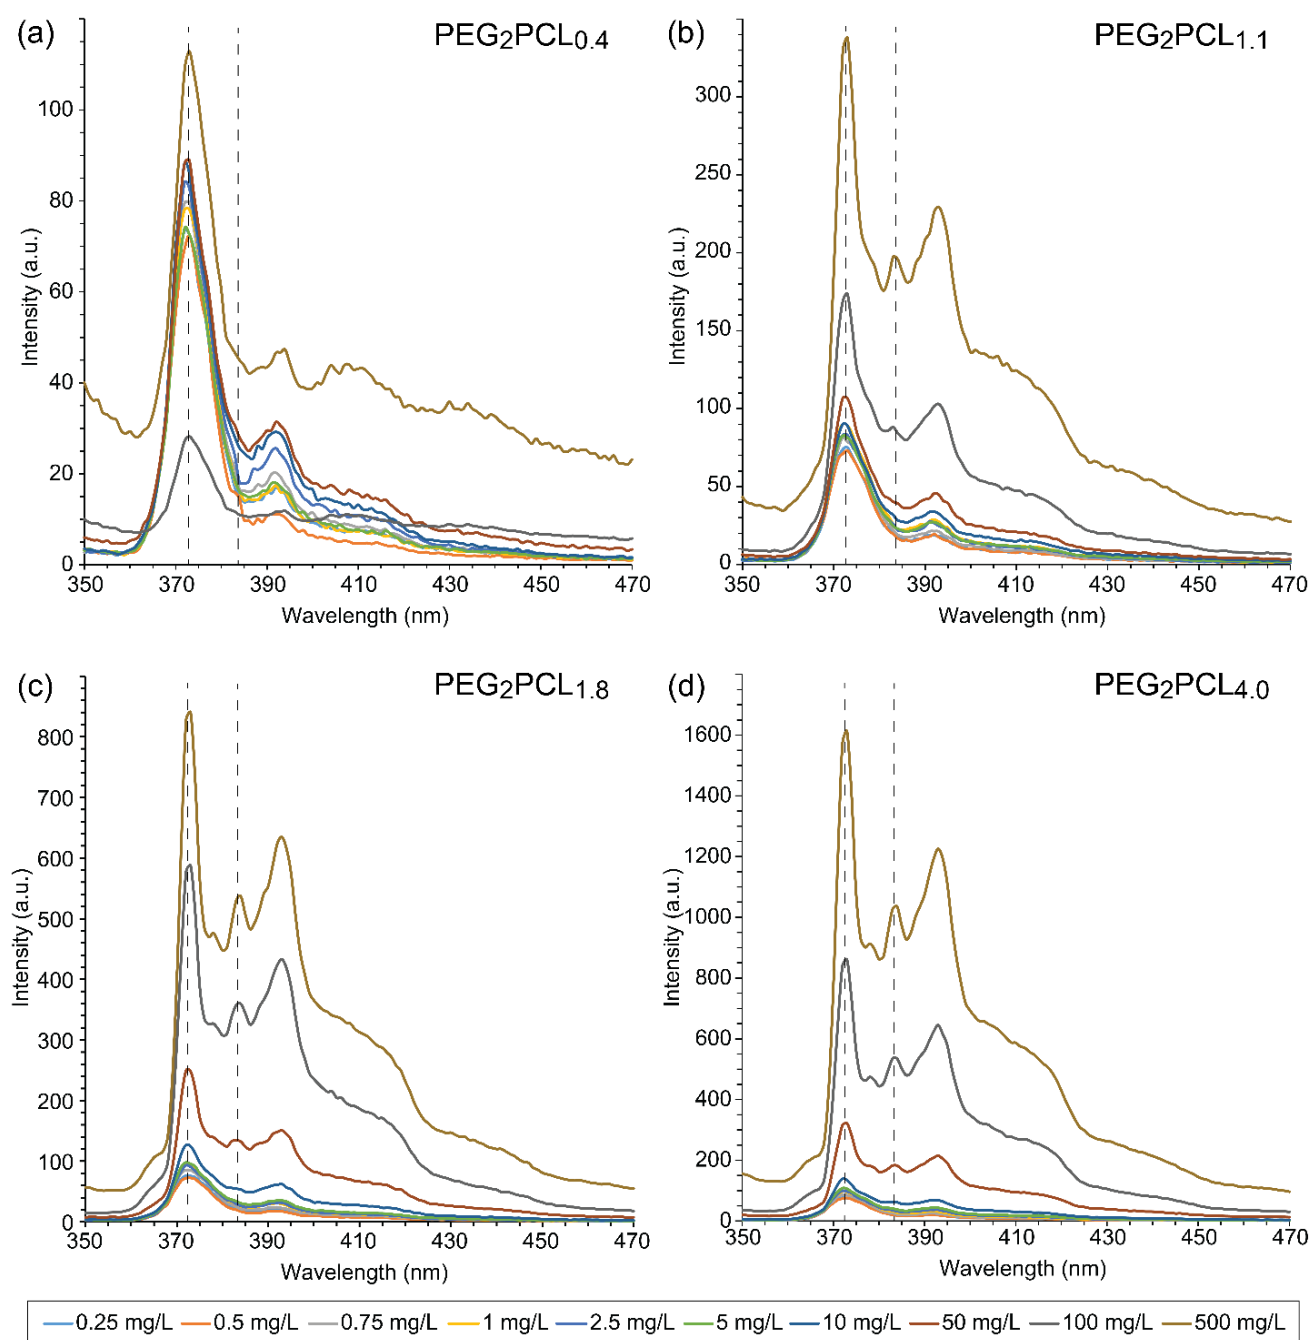

**Figure S1.** Pyrene ( $6 \times 10^{-7}$  M) fluorescent emission spectra ( $\lambda_{\text{ex}} = 334$  nm) for (a) PEG<sub>2</sub>PCL<sub>0.4</sub>, (b) PEG<sub>2</sub>PCL<sub>1.1</sub>, (c) PEG<sub>2</sub>PCL<sub>1.8</sub> and (d) PEG<sub>2</sub>PCL<sub>4.0</sub> copolymers at various copolymer concentrations.

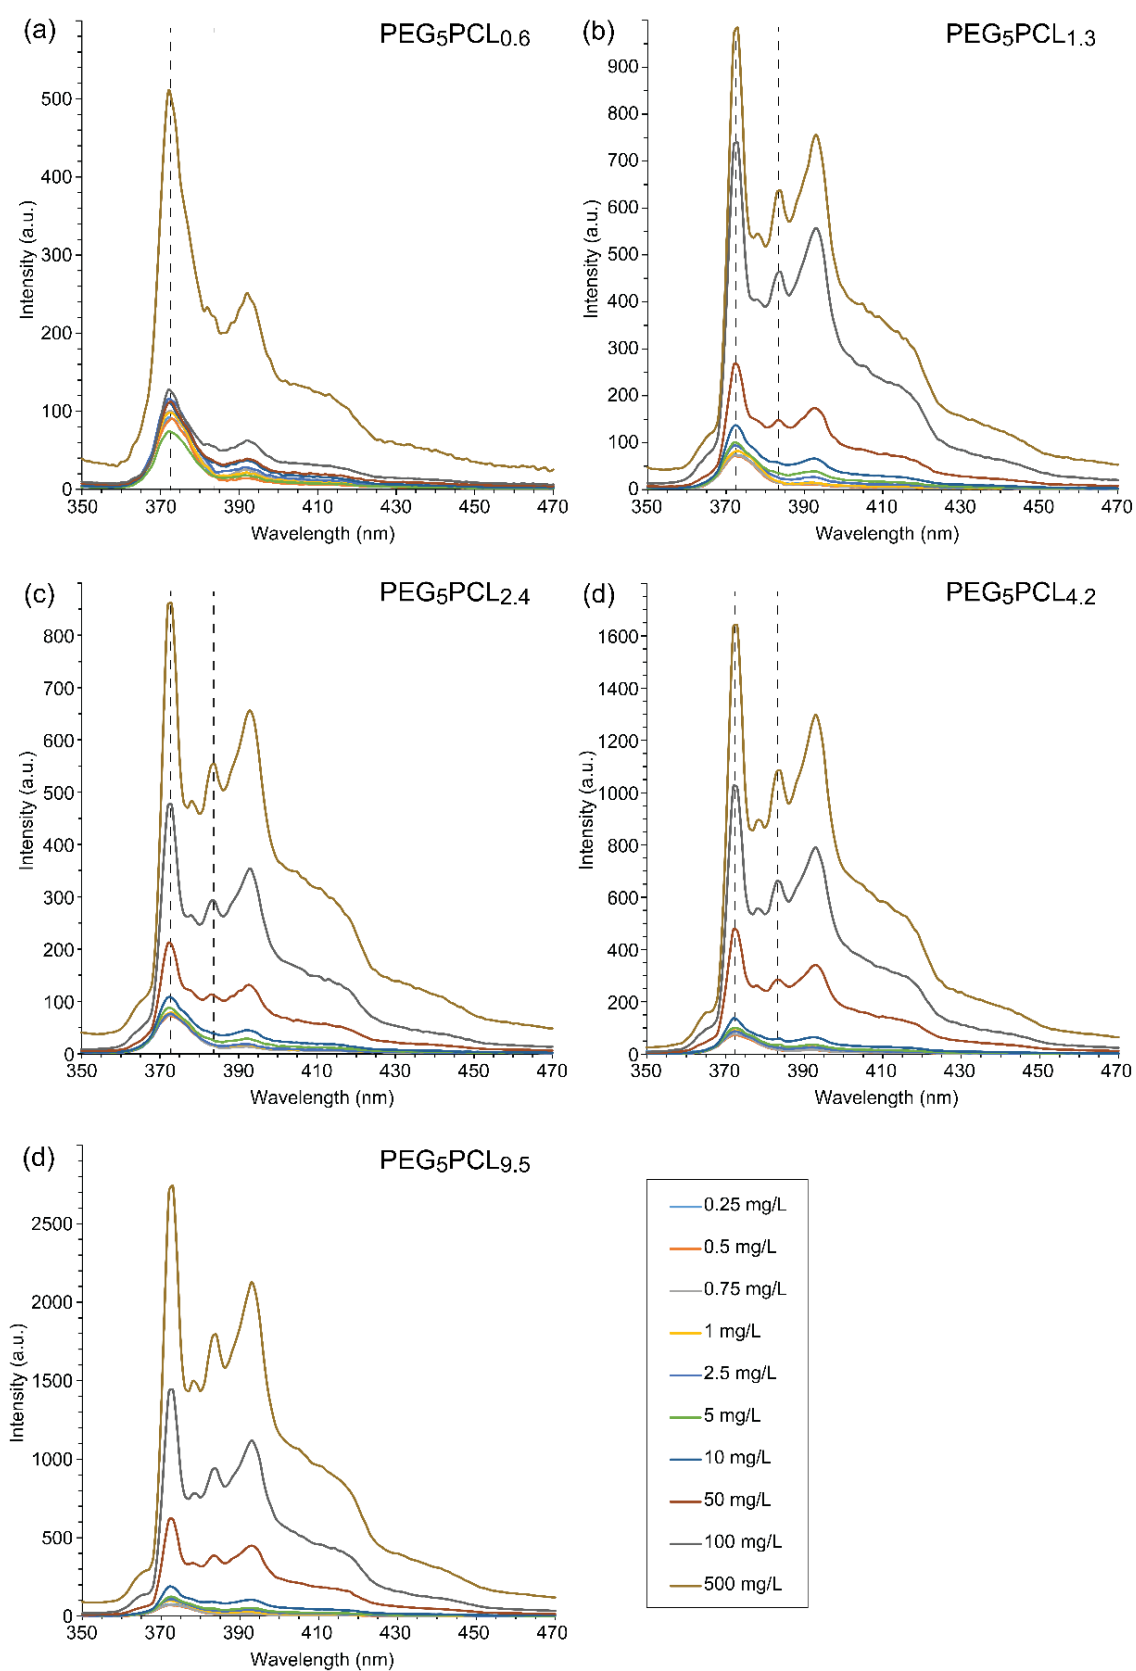

**Figure S2.** Pyrene ( $6 \times 10^{-7}$  M) fluorescent emission spectra ( $\lambda_{\text{ex}} = 334$  nm) for (a) PEG<sub>5</sub>PCL<sub>0.6</sub>, (b) PEG<sub>5</sub>PCL<sub>1.3</sub>, (c) PEG<sub>5</sub>PCL<sub>2.4</sub>, (d) PEG<sub>5</sub>PCL<sub>4.2</sub> and (e) PEG<sub>5</sub>PCL<sub>9.5</sub> copolymers at various copolymer concentrations.

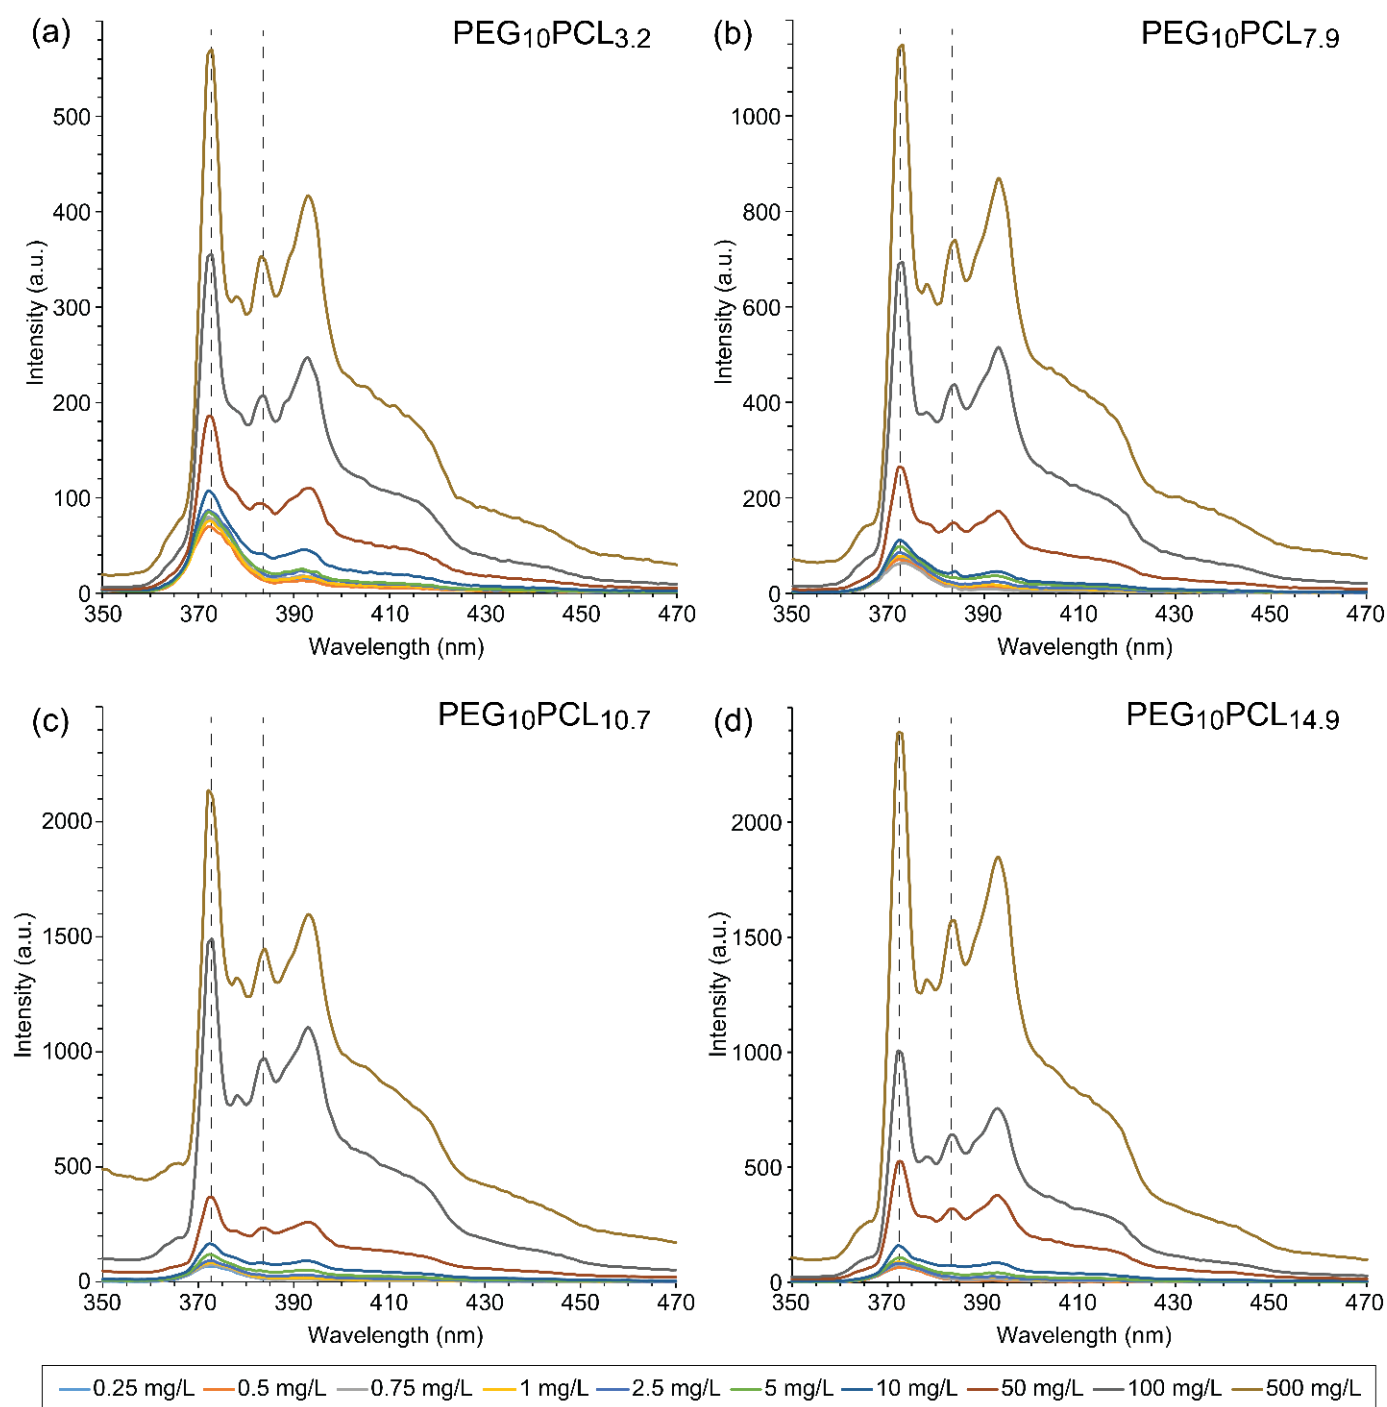

**Figure S3.** Pyrene ( $6 \times 10^{-7}$  M) fluorescent emission spectra ( $\lambda_{\text{ex}} = 334$  nm) for (a) PEG<sub>10</sub>PCL<sub>3.2</sub>, (b) PEG<sub>10</sub>PCL<sub>7.9</sub>, (c) PEG<sub>10</sub>PCL<sub>10.7</sub> and (d) PEG<sub>10</sub>PCL<sub>14.9</sub> copolymers at various copolymer concentrations.

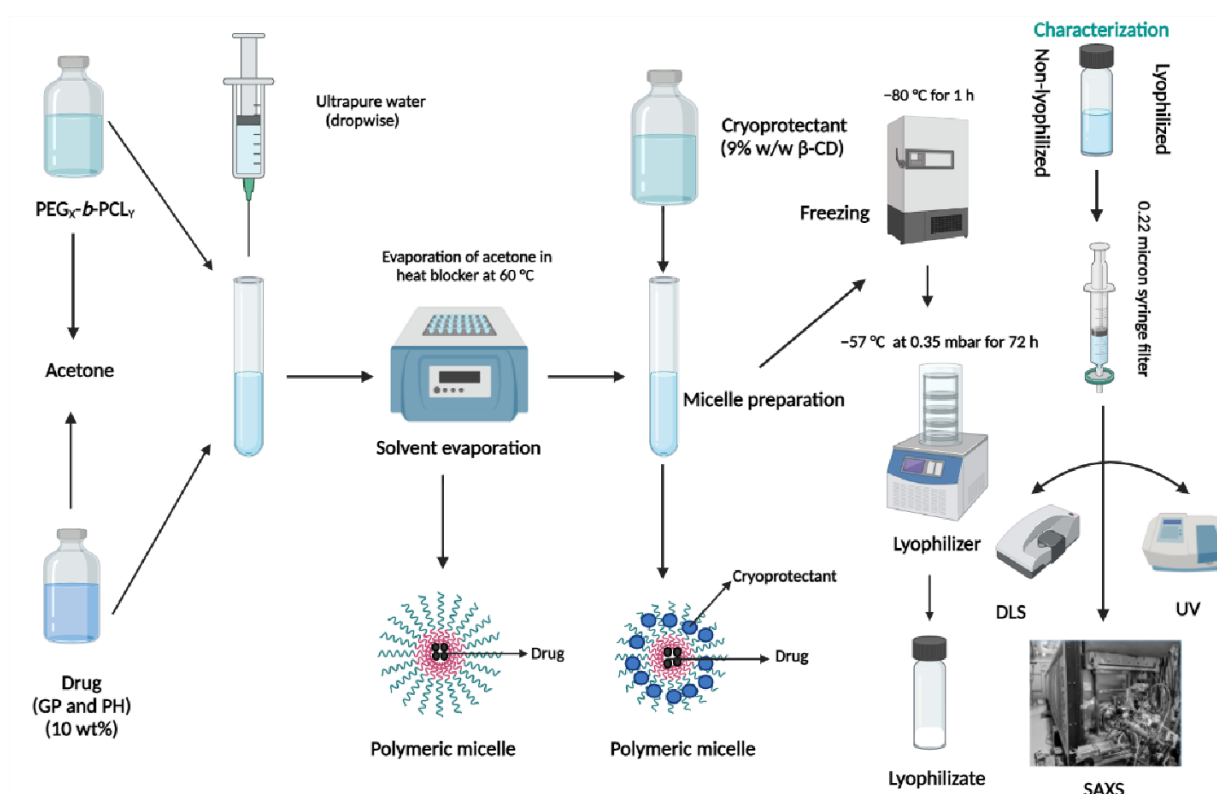

**Figure S4.** Illustration of preparation, lyophilization and characterisation of PEG<sub>x</sub>-b-PCL<sub>y</sub> micelles.

**Table S2.** Polydispersity index (PDI) of micelles before and after lyophilization/reconstitution in the absence and presence of β-CD (-/+CD) as cryoprotectant, as determined by dynamic light scattering DLS; values are expressed as mean ± standard deviation (n=3).

| Copolymer                           | Blank | Gosypol (GP) | Phloretin (PH) | Before freeze-drying (-CD) (PDI ± SD) | Before freeze-drying (+CD) (PDI ± SD) | After freeze-drying (-CD) (PDI ± SD) | After freeze-drying (+CD) (PDI ± SD) |
|-------------------------------------|-------|--------------|----------------|---------------------------------------|---------------------------------------|--------------------------------------|--------------------------------------|
| PEG <sub>2</sub> PCL <sub>0.4</sub> | ✓     | -            | -              | 0.149 ± 0.010                         | 0.156 ± 0.009                         | 0.196 ± 0.010                        | 0.185 ± 0.013                        |
| PEG <sub>2</sub> PCL <sub>1.1</sub> | ✓     | -            | -              | 0.189 ± 0.011                         | 0.245 ± 0.014                         | 0.145 ± 0.048                        | 0.149 ± 0.008                        |
| PEG <sub>2</sub> PCL <sub>1.1</sub> | -     | ✓            | -              | 0.140 ± 0.004                         | 0.179 ± 0.052                         | 0.162 ± 0.025                        | 0.145 ± 0.005                        |
| PEG <sub>2</sub> PCL <sub>1.1</sub> | -     | -            | ✓              | 0.135 ± 0.023                         | 0.158 ± 0.003                         | 0.157 ± 0.009                        | 0.126 ± 0.002                        |
| PEG <sub>2</sub> PCL <sub>1.8</sub> | ✓     | -            | -              | 0.225 ± 0.006                         | 0.252 ± 0.007                         | 0.141 ± 0.001                        | 0.228 ± 0.002                        |
| PEG <sub>2</sub> PCL <sub>1.8</sub> | -     | ✓            | -              | 0.160 ± 0.025                         | 0.187 ± 0.034                         | 0.136 ± 0.008                        | 0.132 ± 0.005                        |
| PEG <sub>2</sub> PCL <sub>1.8</sub> | -     | -            | ✓              | 0.147 ± 0.011                         | 0.178 ± 0.030                         | 0.158 ± 0.008                        | 0.184 ± 0.005                        |
| PEG <sub>2</sub> PCL <sub>4.0</sub> | ✓     | -            | -              | 0.245 ± 0.030                         | 0.195 ± 0.003                         | 0.210 ± 0.011                        | 0.186 ± 0.039                        |
| PEG <sub>5</sub> PCL <sub>0.6</sub> | ✓     | -            | -              | 0.262 ± 0.007                         | 0.242 ± 0.003                         | 0.210 ± 0.016                        | 0.177 ± 0.050                        |
| PEG <sub>5</sub> PCL <sub>1.3</sub> | ✓     | -            | -              | 0.241 ± 0.008                         | 0.245 ± 0.038                         | 0.185 ± 0.016                        | 0.188 ± 0.006                        |
| PEG <sub>5</sub> PCL <sub>1.3</sub> | -     | ✓            | -              | 0.126 ± 0.010                         | 0.185 ± 0.016                         | 0.148 ± 0.006                        | 0.147 ± 0.007                        |
| PEG <sub>5</sub> PCL <sub>1.3</sub> | -     | -            | ✓              | 0.205 ± 0.003                         | 0.257 ± 0.050                         | 0.205 ± 0.003                        | 0.246 ± 0.056                        |
| PEG <sub>5</sub> PCL <sub>2.4</sub> | ✓     | -            | -              | 0.192 ± 0.008                         | 0.145 ± 0.030                         | 0.176 ± 0.035                        | 0.163 ± 0.011                        |
| PEG <sub>5</sub> PCL <sub>2.4</sub> | -     | ✓            | -              | 0.220 ± 0.060                         | 0.201 ± 0.004                         | 0.236 ± 0.017                        | 0.158 ± 0.008                        |
| PEG <sub>5</sub> PCL <sub>2.4</sub> | -     | -            | ✓              | 0.197 ± 0.002                         | 0.139 ± 0.005                         | 0.131 ± 0.002                        | 0.159 ± 0.014                        |
| PEG <sub>5</sub> PCL <sub>4.2</sub> | ✓     | -            | -              | 0.123 ± 0.006                         | 0.132 ± 0.046                         | 0.176 ± 0.006                        | 0.138 ± 0.005                        |
| PEG <sub>5</sub> PCL <sub>4.2</sub> | -     | ✓            | -              | 0.192 ± 0.004                         | 0.175 ± 0.003                         | 0.156 ± 0.019                        | 0.158 ± 0.016                        |
| PEG <sub>5</sub> PCL <sub>4.2</sub> | -     | -            | ✓              | 0.168 ± 0.028                         | 0.085 ± 0.009                         | 0.140 ± 0.040                        | 0.137 ± 0.034                        |
| PEG <sub>5</sub> PCL <sub>9.5</sub> | ✓     | -            | -              | 0.138 ± 0.004                         | 0.145 ± 0.011                         | 0.128 ± 0.011                        | 0.116 ± 0.021                        |
| PEG <sub>5</sub> PCL <sub>9.5</sub> | -     | ✓            | -              | 0.193 ± 0.002                         | 0.197 ± 0.005                         | 0.153 ± 0.011                        | 0.156 ± 0.016                        |

|                                       |   |   |   |               |               |               |               |
|---------------------------------------|---|---|---|---------------|---------------|---------------|---------------|
| PEG <sub>5</sub> PCL <sub>9.5</sub>   | - | - | ✓ | 0.144 ± 0.013 | 0.127 ± 0.011 | 0.118 ± 0.019 | 0.168 ± 0.030 |
| PEG <sub>10</sub> PCL <sub>3.2</sub>  | ✓ | - | - | 0.173 ± 0.004 | 0.186 ± 0.006 | 0.133 ± 0.002 | 0.186 ± 0.015 |
| PEG <sub>10</sub> PCL <sub>7.9</sub>  | ✓ | - | - | 0.170 ± 0.009 | 0.176 ± 0.003 | 0.195 ± 0.020 | 0.172 ± 0.009 |
| PEG <sub>10</sub> PCL <sub>7.9</sub>  | - | ✓ | - | 0.183 ± 0.013 | 0.172 ± 0.007 | 0.243 ± 0.011 | 0.232 ± 0.009 |
| PEG <sub>10</sub> PCL <sub>7.9</sub>  | - | - | ✓ | 0.149 ± 0.014 | 0.164 ± 0.006 | 0.182 ± 0.006 | 0.216 ± 0.024 |
| PEG <sub>10</sub> PCL <sub>10.7</sub> | ✓ | - | - | 0.146 ± 0.017 | 0.149 ± 0.007 | 0.119 ± 0.006 | 0.125 ± 0.002 |
| PEG <sub>10</sub> PCL <sub>10.7</sub> | - | ✓ | - | 0.138 ± 0.006 | 0.153 ± 0.008 | 0.186 ± 0.006 | 0.187 ± 0.013 |
| PEG <sub>10</sub> PCL <sub>10.7</sub> | - | - | ✓ | 0.116 ± 0.007 | 0.225 ± 0.042 | 0.230 ± 0.005 | 0.191 ± 0.017 |
| PEG <sub>10</sub> PCL <sub>14.9</sub> | ✓ | - | - | 0.160 ± 0.008 | 0.160 ± 0.011 | 0.128 ± 0.013 | 0.187 ± 0.025 |

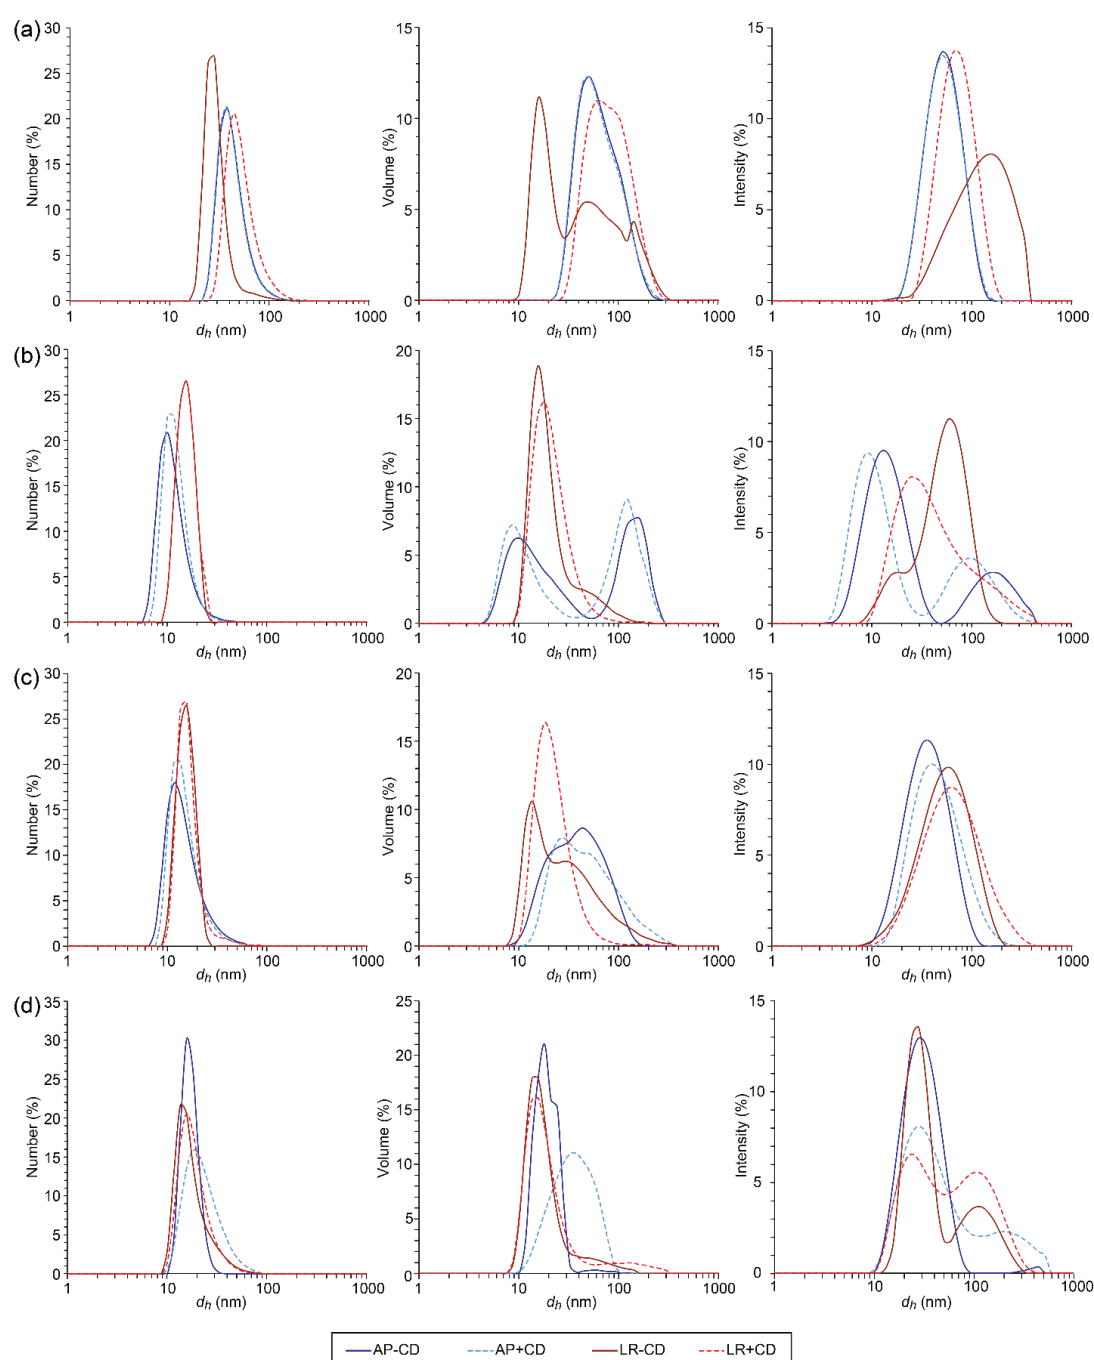

**Figure S5.** Number, volume and intensity particle size distributions for (a) PEG<sub>2</sub>PCL<sub>0.4</sub>, (b) PEG<sub>2</sub>PCL<sub>1.1</sub>, (c) PEG<sub>2</sub>PCL<sub>1.8</sub> and (d) PEG<sub>2</sub>PCL<sub>4.0</sub> micelles as prepared (AP) and after lyophilization/reconstitution (LR) in the absence and presence of  $\beta$ -CD (-/+CD).

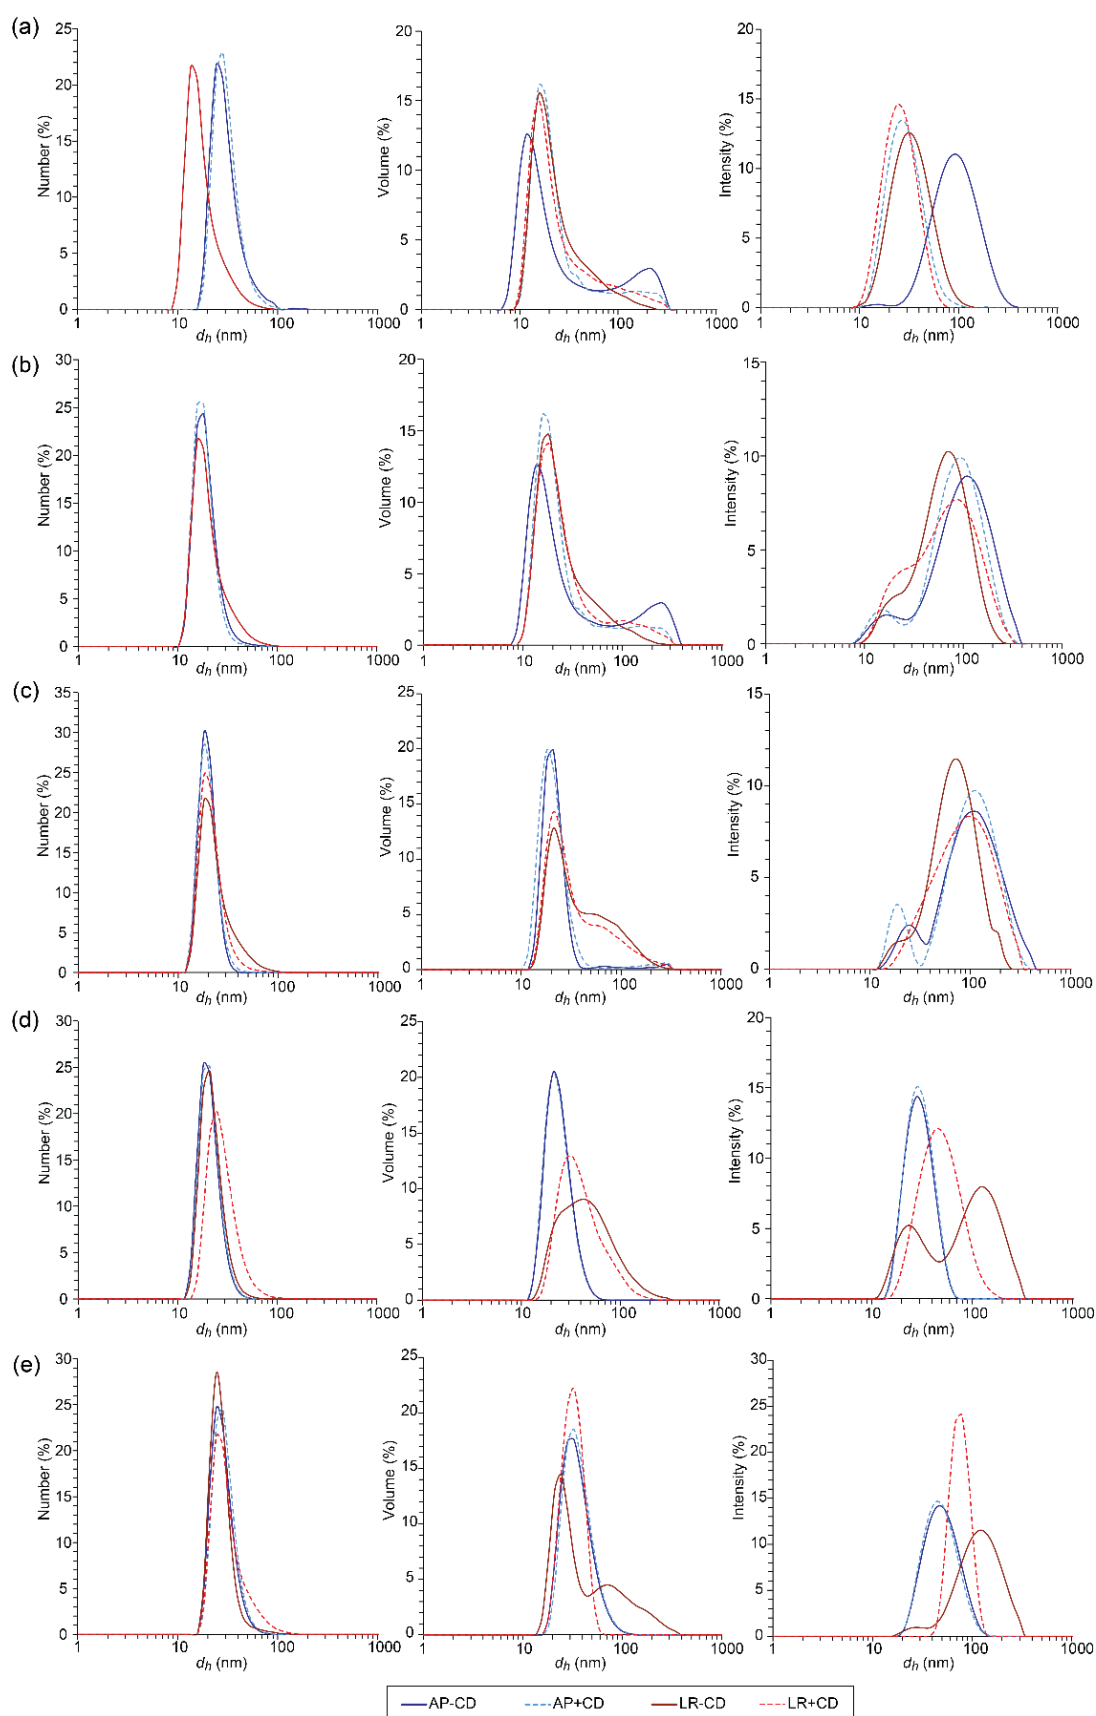

**Figure S6.** Number, volume and intensity particle size distributions for (a) PEG<sub>5</sub>PCL<sub>0.6</sub>, (b) PEG<sub>5</sub>PCL<sub>1.3</sub>, (c) PEG<sub>5</sub>PCL<sub>2.4</sub>, (d) PEG<sub>5</sub>PCL<sub>4.2</sub> and (e) PEG<sub>5</sub>PCL<sub>9.5</sub> micelles as prepared (AP) and after lyophilization/reconstitution (LR) in the absence and presence of  $\beta$ -CD (-/+CD).

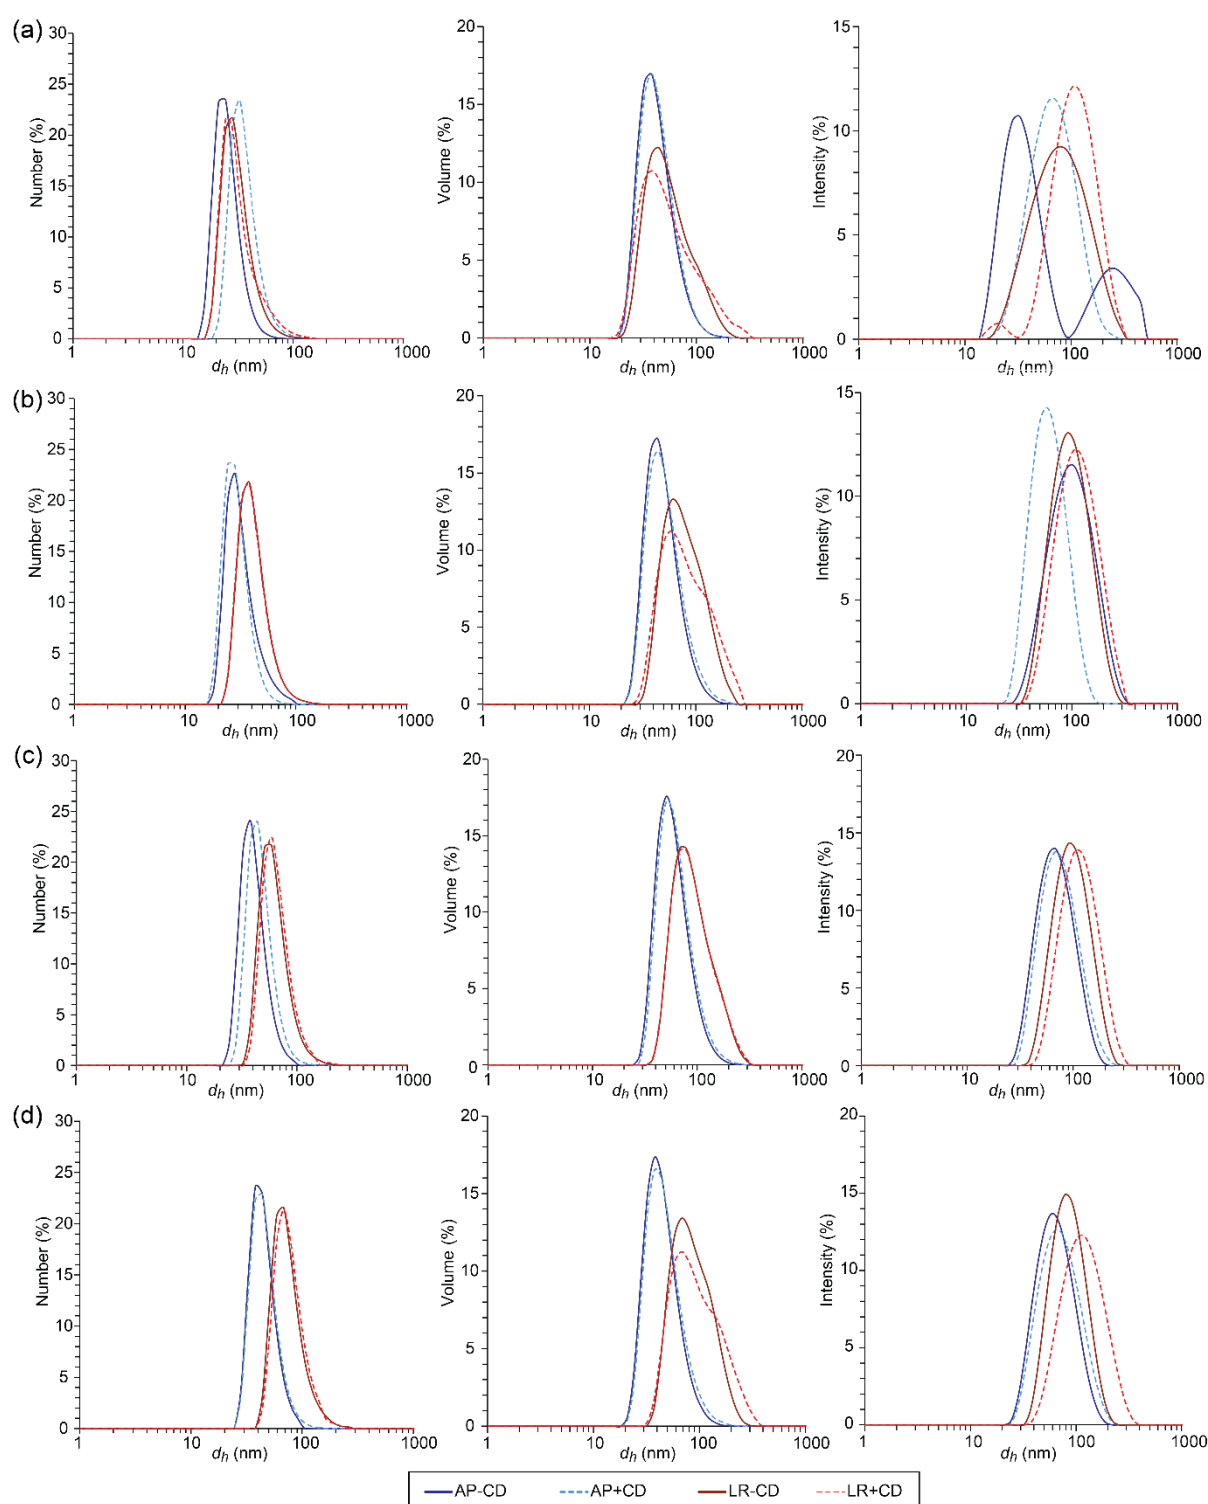

**Figure S7.** Number, volume and intensity particle size distributions for (a) PEG<sub>10</sub>PCL<sub>3.2</sub>, (b) PEG<sub>10</sub>PCL<sub>7.9</sub>, (c) PEG<sub>10</sub>PCL<sub>10.7</sub> and (d) PEG<sub>10</sub>PCL<sub>14.9</sub> micelles as prepared (AP) and after lyophilization/reconstitution (LR) in the absence and presence of  $\beta$ -CD (-/+CD).



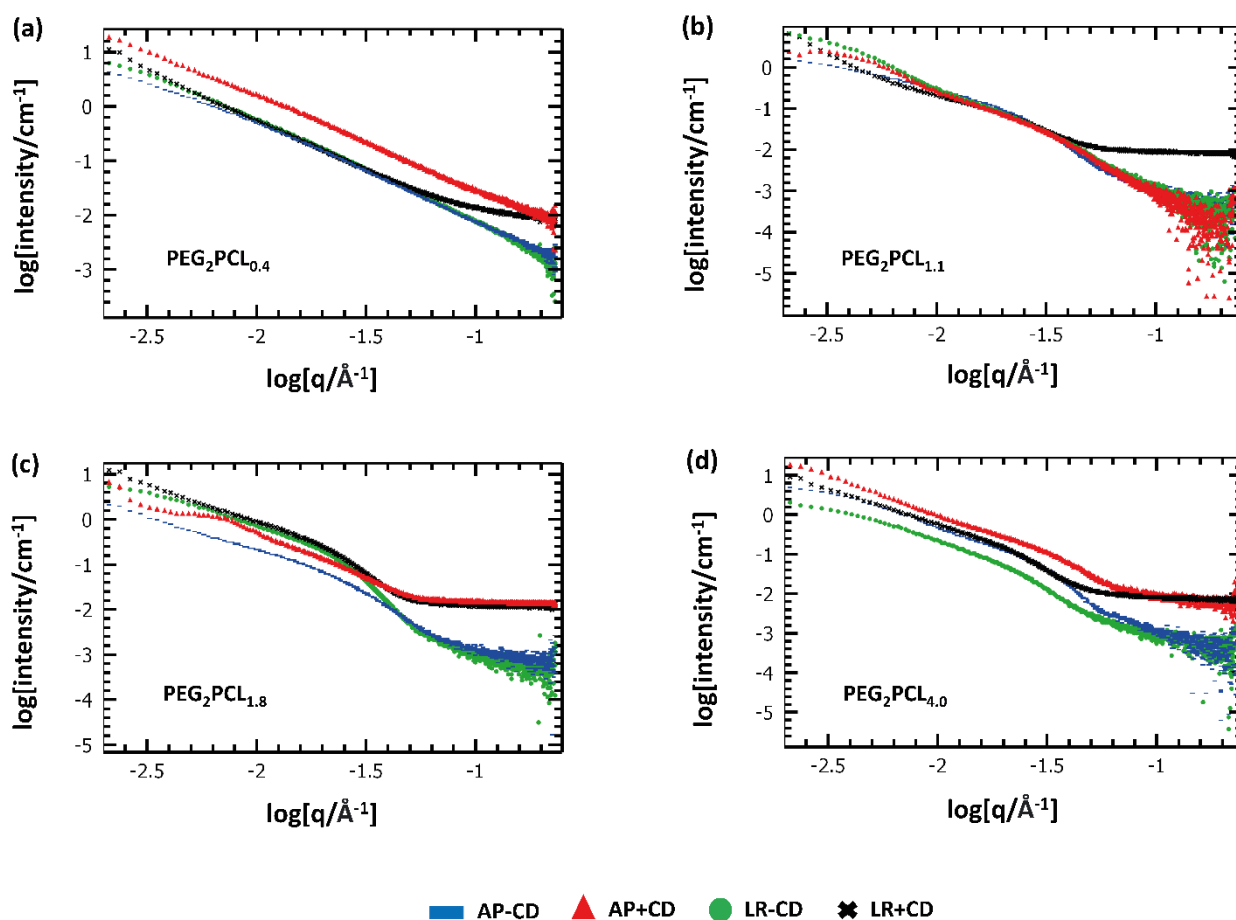

**Figure S8.** SAXS profiles for (a) PEG<sub>2</sub>PCL<sub>0.4</sub>, (b) PEG<sub>2</sub>PCL<sub>1.1</sub>, (c) PEG<sub>2</sub>PCL<sub>1.8</sub> and (d) PEG<sub>2</sub>PCL<sub>4.0</sub> micelles/aggregates as prepared (AP) and after lyophilization/reconstitution (LR) in the absence and presence of β-CD (-/+CD).

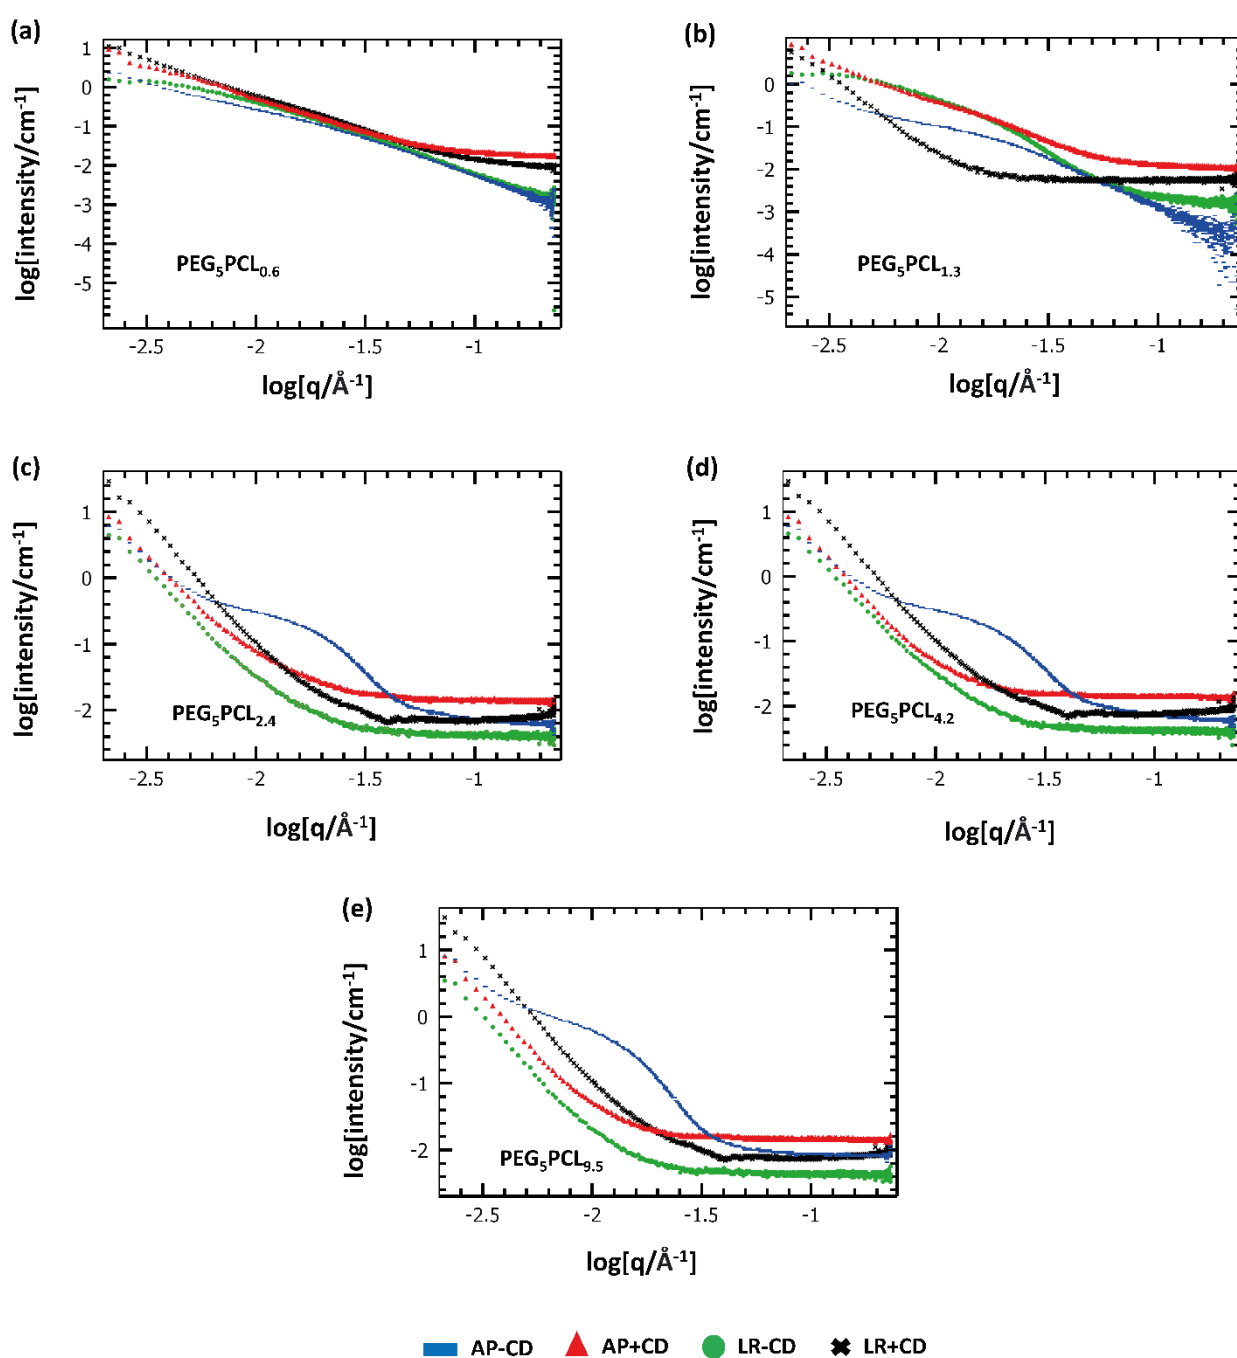

**Figure S9.** SAXS profiles for (a) PEG<sub>5</sub>PCL<sub>0.6</sub>, (b) PEG<sub>5</sub>PCL<sub>1.3</sub>, (c) PEG<sub>5</sub>PCL<sub>2.4</sub>, (d) PEG<sub>5</sub>PCL<sub>4.2</sub> and (e) PEG<sub>5</sub>PCL<sub>9.5</sub> micelles/aggregates as prepared (AP) and after lyophilization/reconstitution (LR) in the absence and presence of β-CD (-/+CD). Background multiplication factor (BMF) for PEG<sub>5</sub>PCL<sub>1.3</sub> LR+CD, PEG<sub>5</sub>PCL<sub>2.4</sub> LR+CD, PEG<sub>5</sub>PCL<sub>4.2</sub> LR+CD and PEG<sub>5</sub>PCL<sub>9.5</sub> LR+CD was 0.72, 0.55, 0.55 and 0.53, respectively.

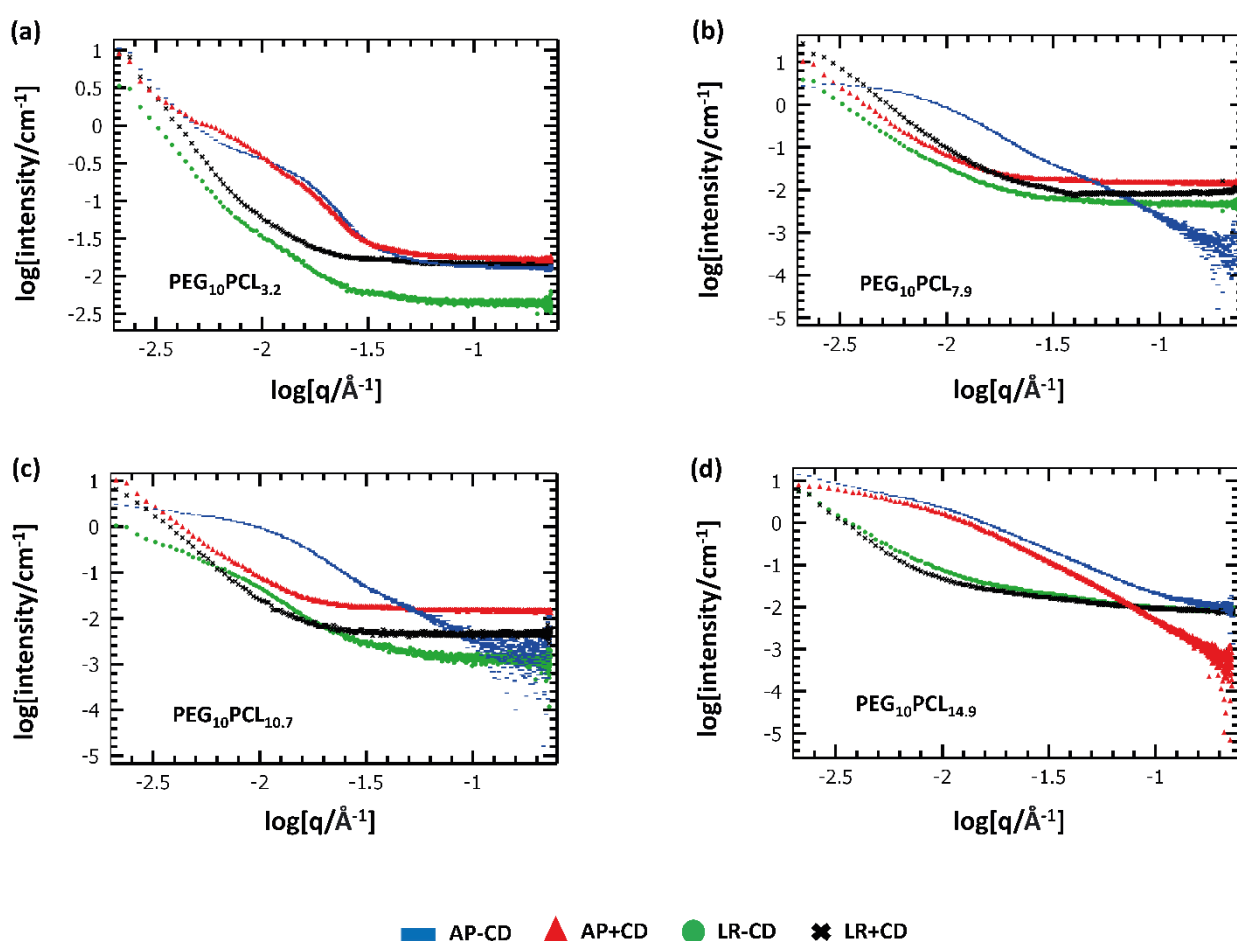

**Figure S10.** SAXS profiles for (a) PEG<sub>10</sub>PCL<sub>3.2</sub>, (b) PEG<sub>10</sub>PCL<sub>7.9</sub>, (c) PEG<sub>10</sub>PCL<sub>10.7</sub> and (d) PEG<sub>10</sub>PCL<sub>14.9</sub> micelles/aggregates as prepared (AP) and after lyophilization/reconstitution (LR) in the absence and presence of  $\beta$ -CD (-/+CD) (BMF for PEG<sub>10</sub>PCL<sub>3.2</sub> LR+CD, PEG<sub>10</sub>PCL<sub>7.9</sub> LR+CD and PEG<sub>10</sub>PCL<sub>10.7</sub> LR+CD was 0.45, 0.55 and 0.53, respectively).

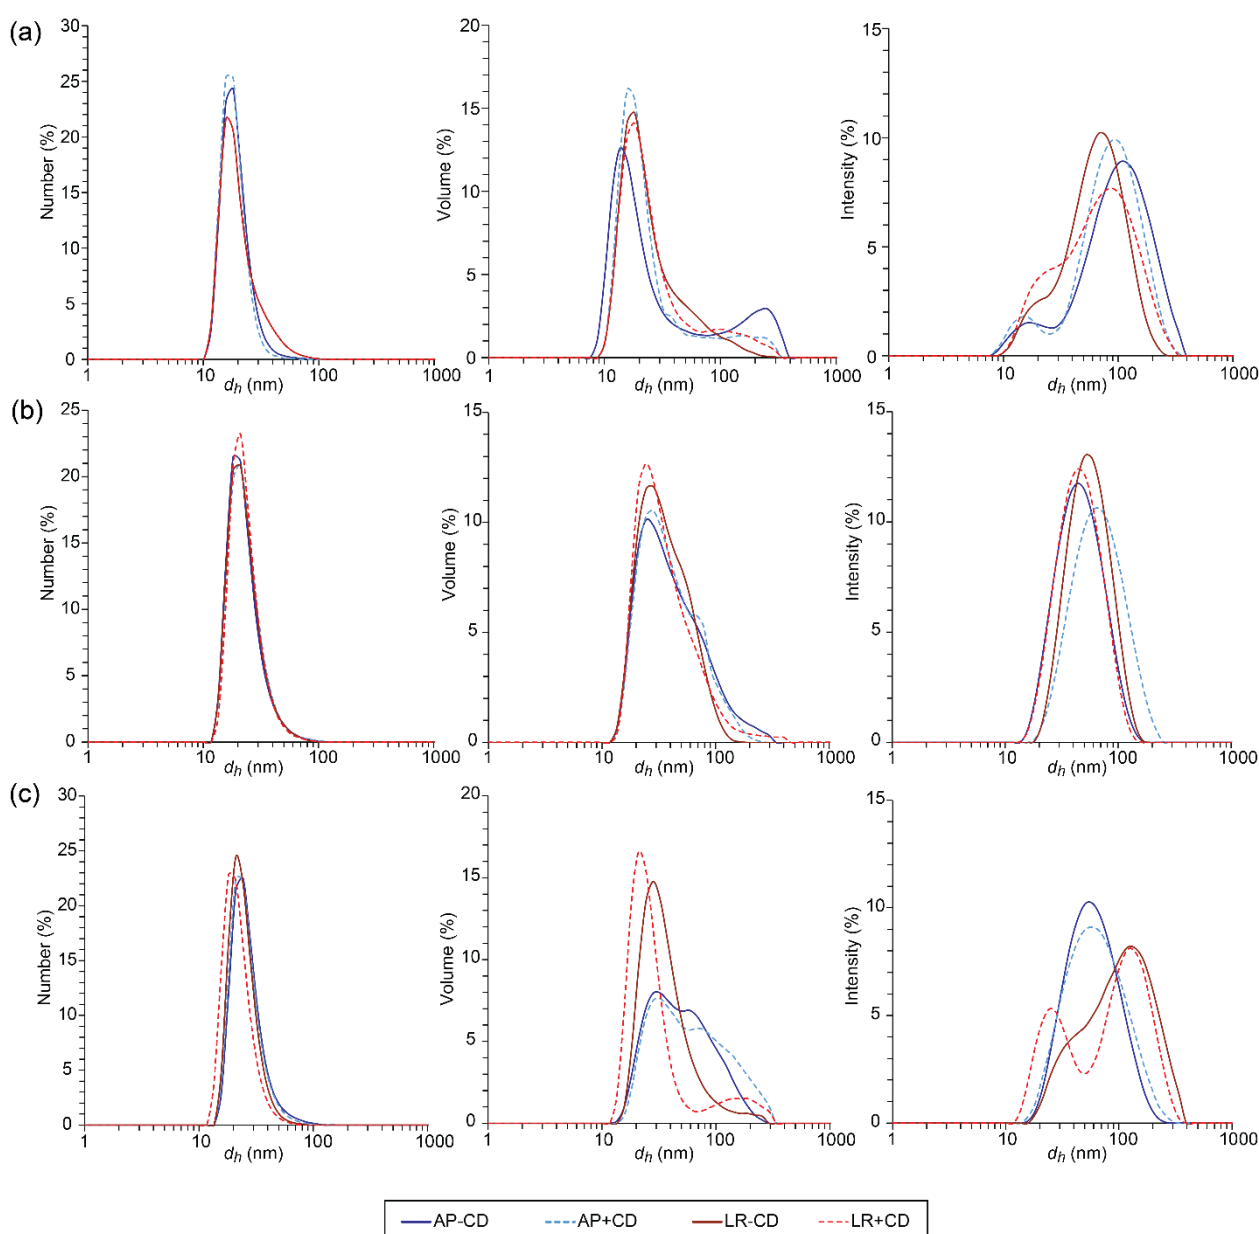

**Figure S11.** Number, volume and intensity particle size distributions for PEG<sub>5</sub>PCL<sub>1.3</sub> (a) blank micelles and (b) gossypol (GP) and (c) phloretin (PH) loaded micelles as prepared (AP) and after lyophilization/reconstitution (LR) in the absence and presence of  $\beta$ -CD (-/+CD).

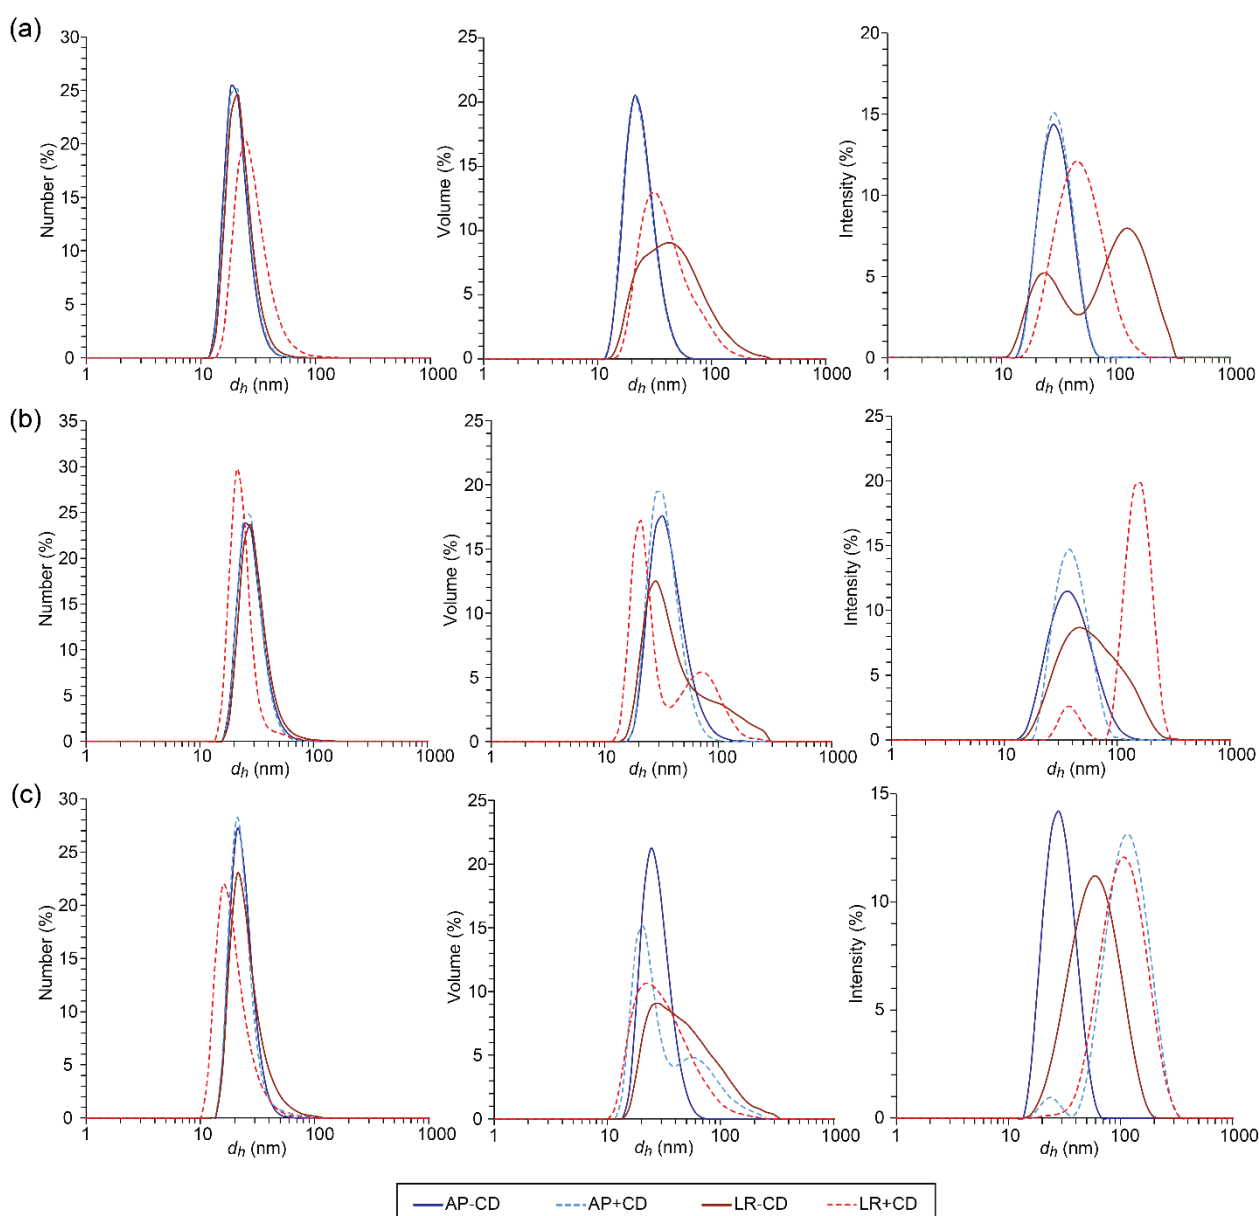

**Figure S12.** Number, volume and intensity particle size distributions for PEG<sub>5</sub>PCL<sub>2.4</sub> (a) blank micelles and (b) gossypol (GP) and (c) phloretin (PH) loaded micelles as prepared (AP) and after lyophilization/reconstitution (LR) in the absence and presence of  $\beta$ -CD (-/+CD).



**Figure S13.** Number, volume and intensity particle size distributions for PEG<sub>5</sub>PCL<sub>4.2</sub> (a) blank micelles and (b) gossypol (GP) and (c) phloretin (PH) loaded micelles as prepared (AP) and after lyophilization/reconstitution (LR) in the absence and presence of  $\beta$ -CD (-/+CD).

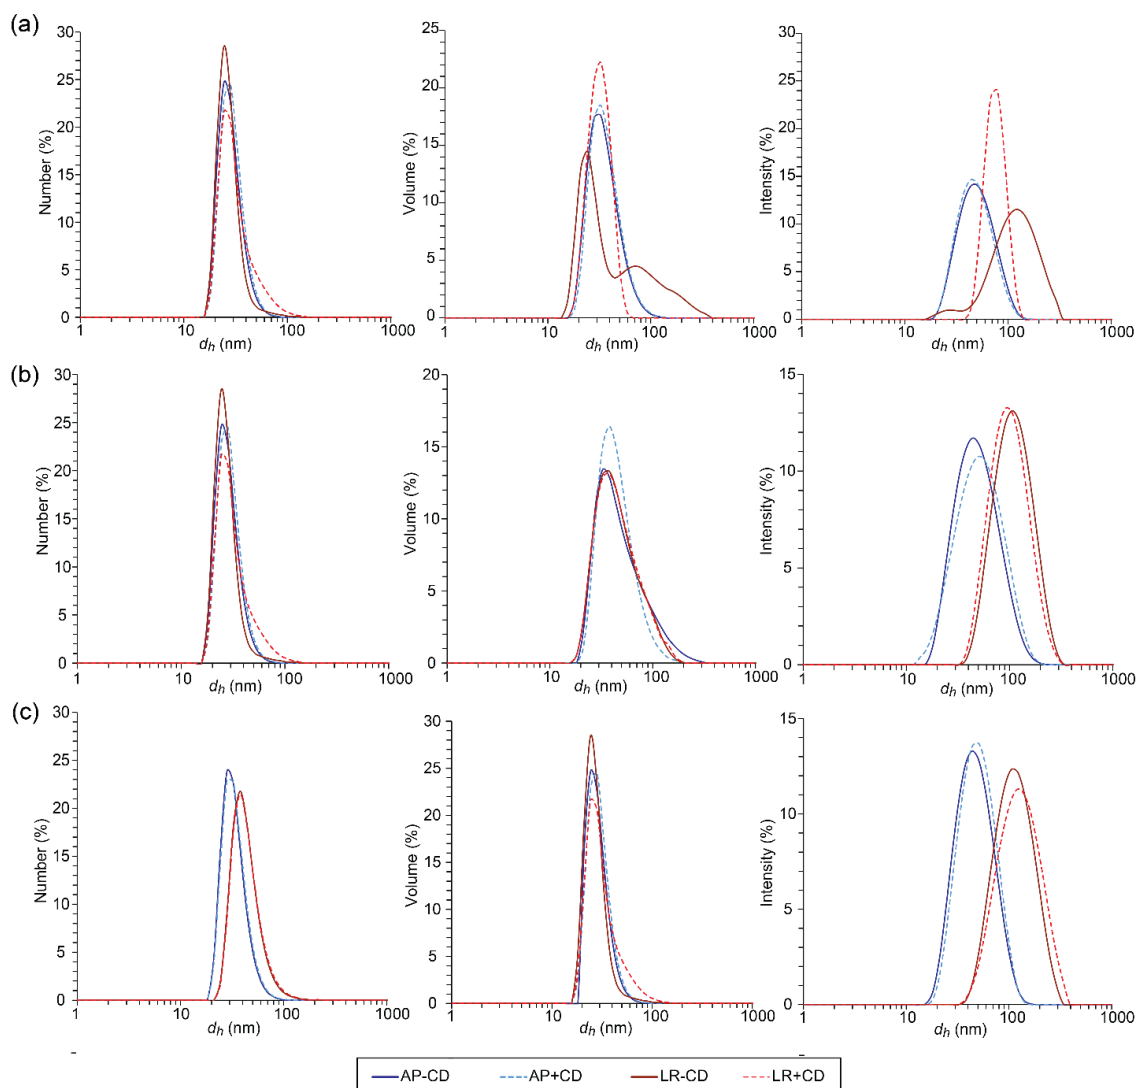

**Figure S14.** Number, volume and intensity particle size distributions for PEG<sub>5</sub>PCL<sub>9.5</sub> (a) blank micelles and (b) gossypol (GP) and (c) phloretin (PH) loaded micelles as prepared (AP) and after lyophilization/reconstitution (LR) in the absence and presence of  $\beta$ -CD (-/+CD).

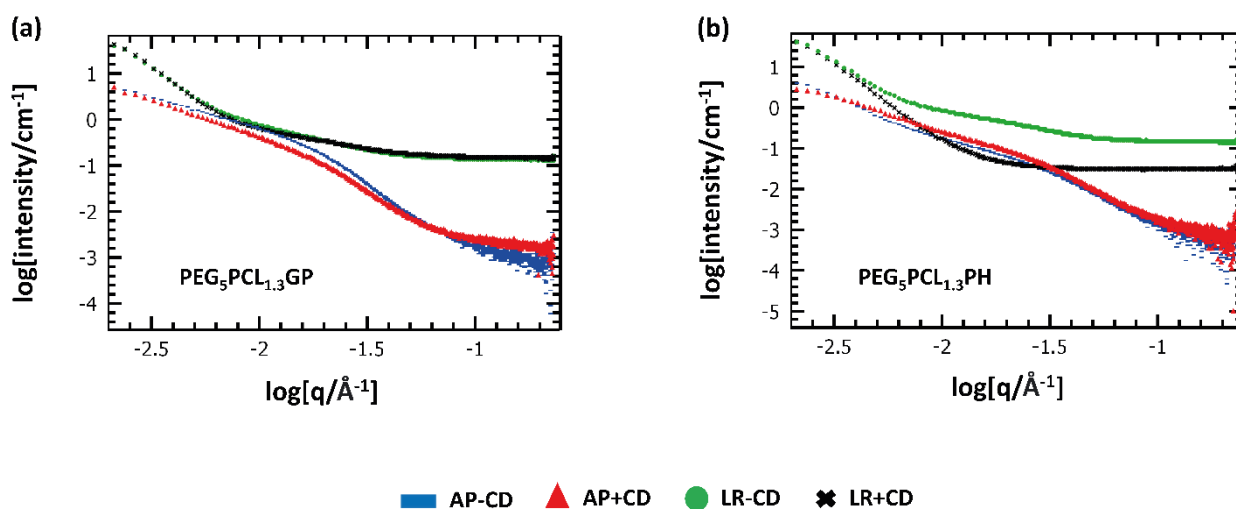

**Figure S15.** SAXS profiles for (a) gossypol and (b) phloretin loaded PEG<sub>5</sub>PCL<sub>1.3</sub> micelles as prepared (AP) and after lyophilization/reconstitution (LR) in the absence and presence of  $\beta$ -CD (-/+CD).

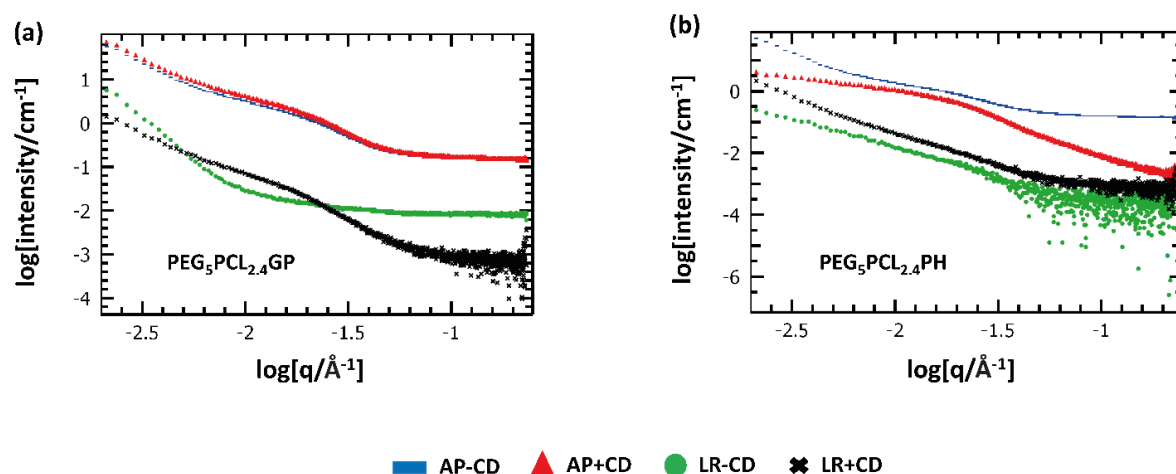

**Figure S16.** SAXS profiles for (a) gossypol and (b) phloretin loaded  $\text{PEG}_5\text{PCL}_{2.4}$  micelles as prepared (AP) and after lyophilization/reconstitution (LR) in the absence and presence of  $\beta$ -CD (-/+CD).

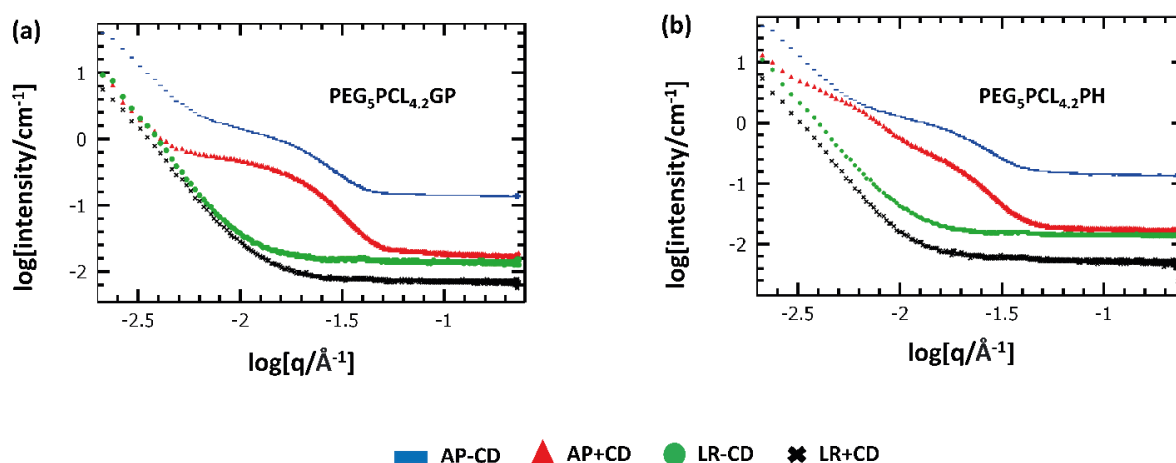

**Figure S17.** SAXS profiles for (a) gossypol and (b) phloretin loaded  $\text{PEG}_5\text{PCL}_{4.2}$  micelles as prepared (AP) and after lyophilization/reconstitution (LR) in the absence and presence of  $\beta$ -CD (-/+CD) (BMF for  $\text{PEG}_5\text{PCL}_{4.2}$  GP LR+CD and  $\text{PEG}_5\text{PCL}_{4.2}$  PH LR+CD was 0.65 and 0.91, respectively).

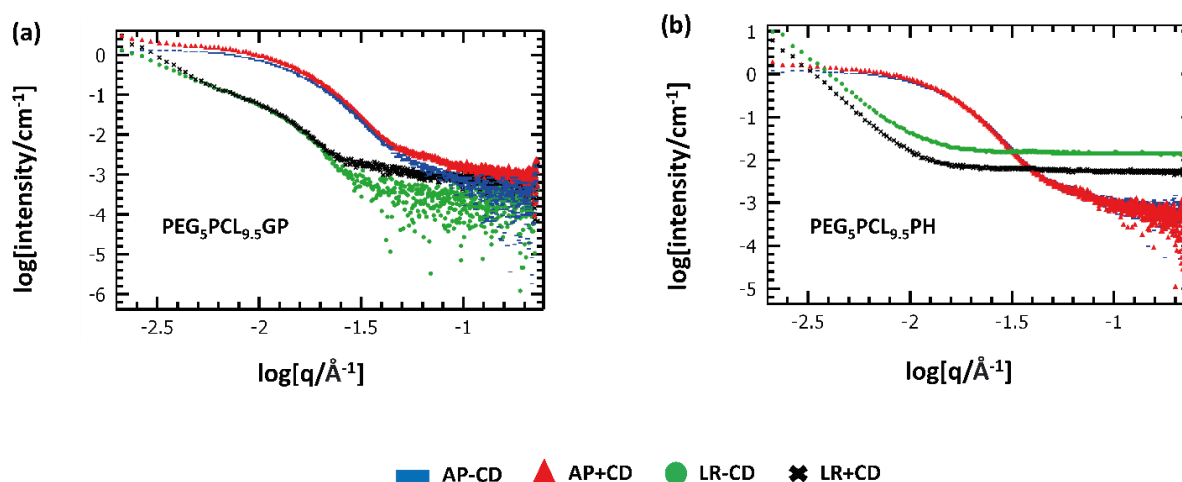

**Figure S18.** SAXS profiles for (a) gossypol and (b) phloretin loaded  $\text{PEG}_5\text{PCL}_{9.5}$  micelles as prepared (AP) and after lyophilization/reconstitution (LR) in the absence and presence of  $\beta$ -CD (-/+CD) (BMF for  $\text{PEG}_5\text{PCL}_{9.5}$  PH LR+CD was 0.91).



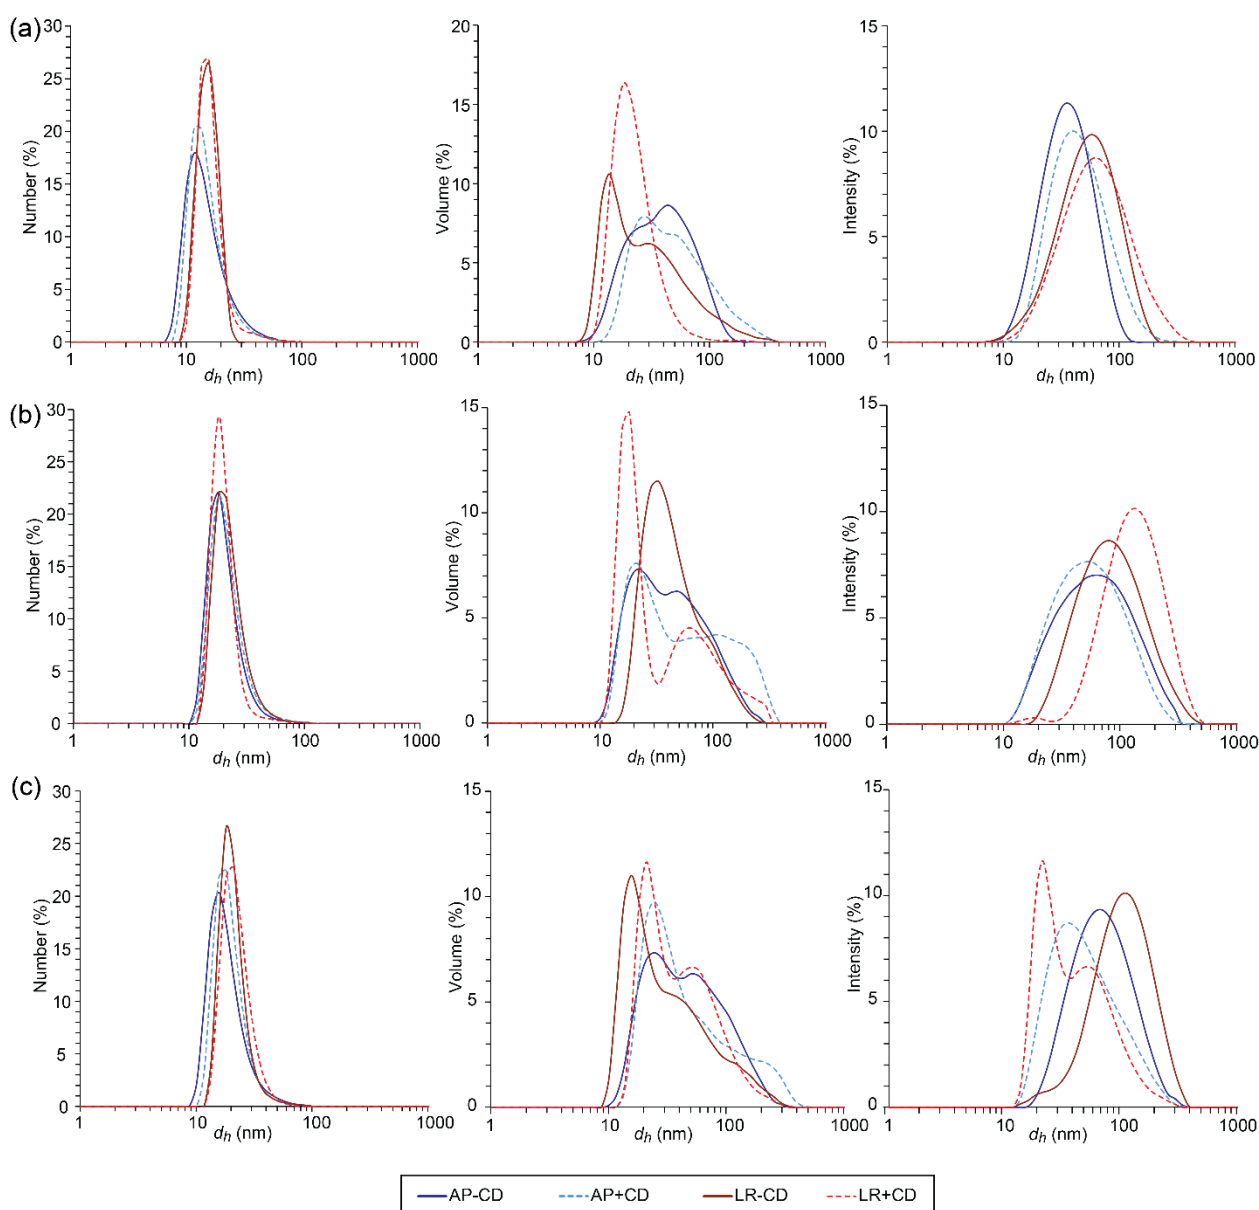

**Figure S19.** Number, volume and intensity particle size distributions for PEG<sub>2</sub>PCL<sub>1.8</sub> (a) blank micelles and (b) gossypol (GP) and (c) phloretin (PH) loaded micelles as prepared (AP) and after lyophilization/reconstitution (LR) in the absence and presence of  $\beta$ -CD (-/+CD).

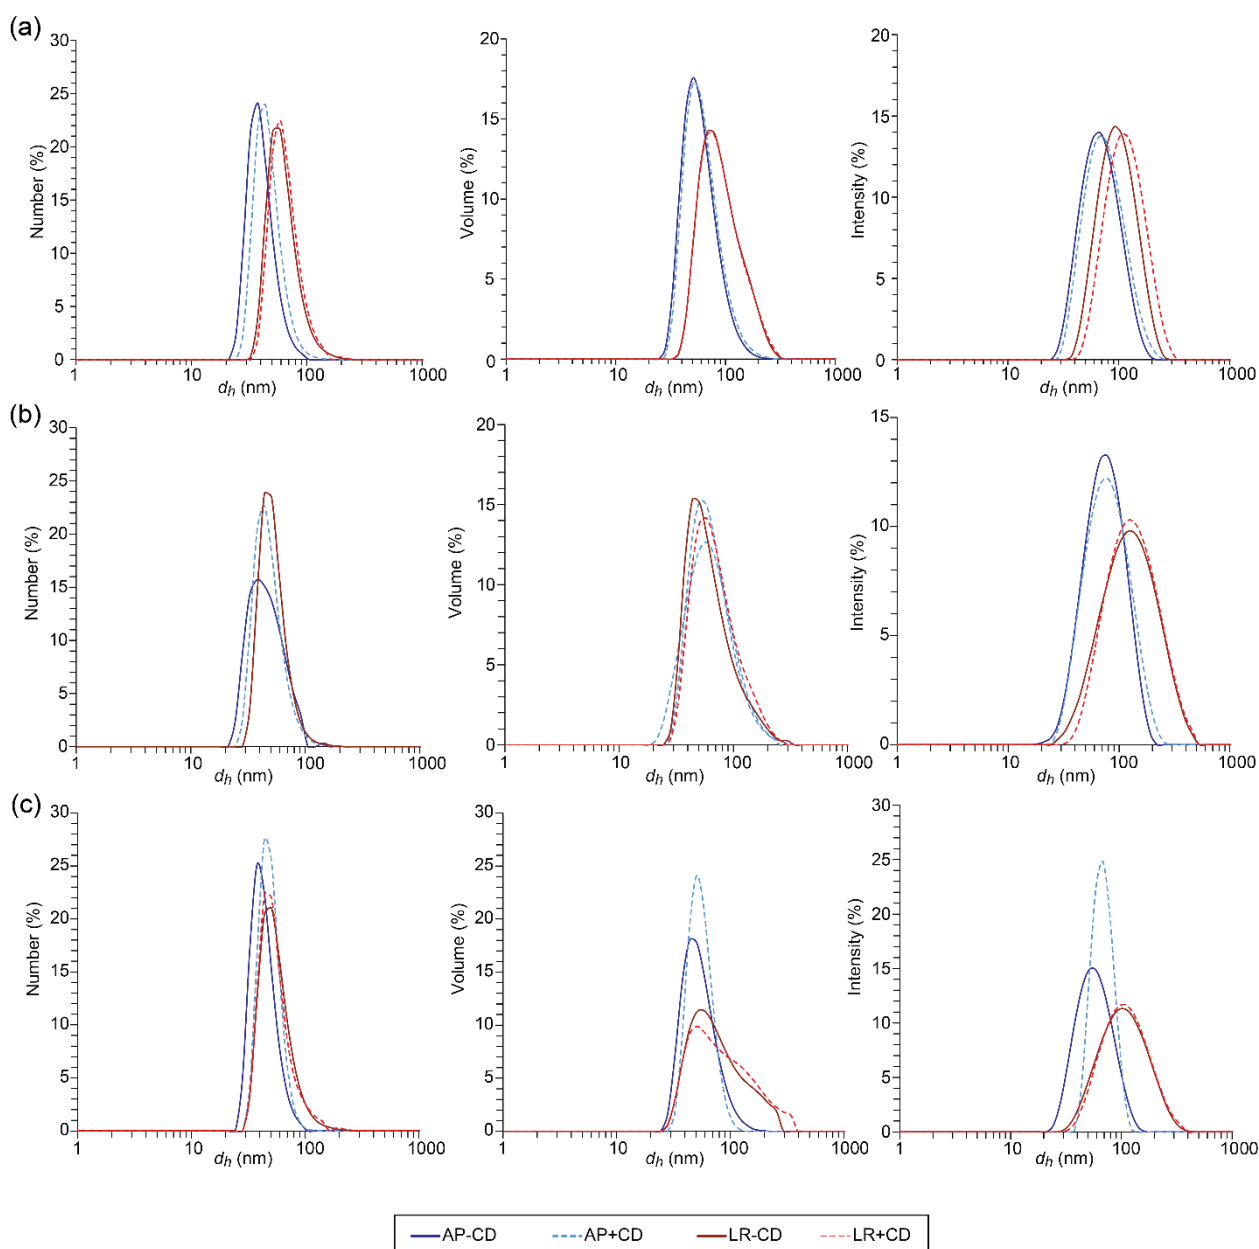

**Figure S20.** Number, volume and intensity particle size distributions for PEG<sub>10</sub>PCL<sub>10.7</sub> (a) blank micelles and (b) gossypol (GP) and (c) phloretin (PH) loaded micelles as prepared (AP) and after lyophilization/reconstitution (LR) in the absence and presence of  $\beta$ -CD (-/+CD).

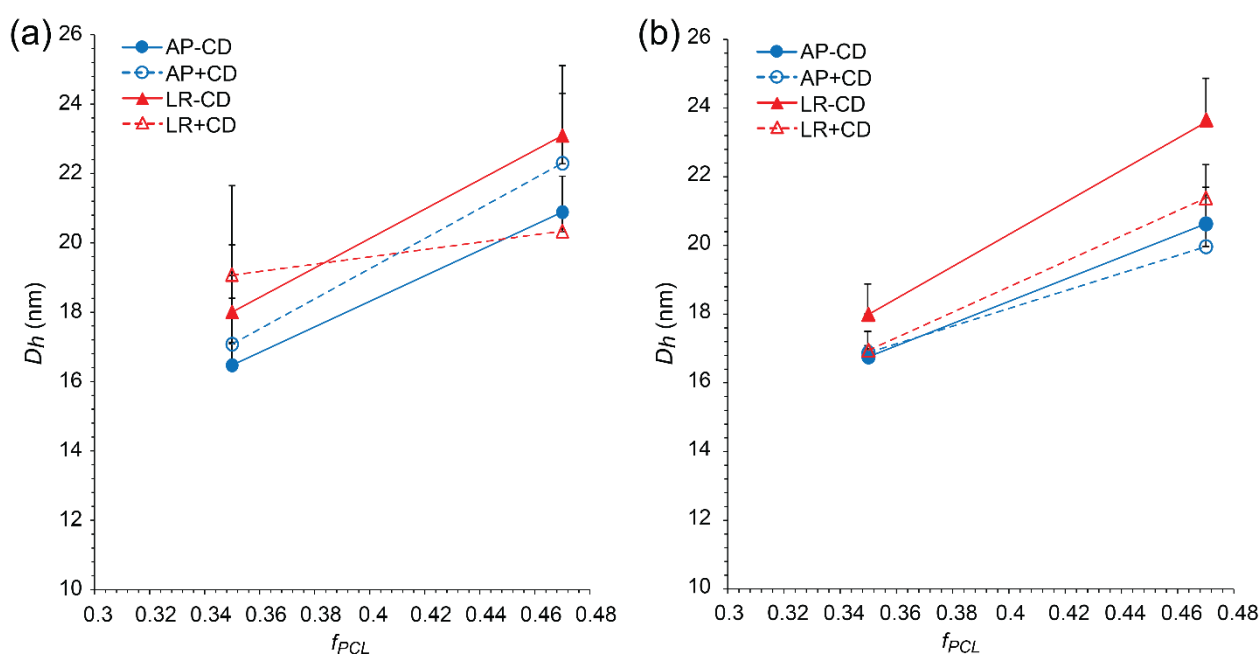

**Figure S21.** Hydrodynamic diameter ( $D_h$ ) versus weight fraction of PCL ( $f_{PCL}$ ) as determined from number particle size distributions (PSDs) for (a) gossypol (GP) and (b) phloretin (PH) loaded PEG<sub>2</sub>PCL<sub>1.8</sub> micelles as prepared (AP) and after lyophilization/reconstitution (LR) and in the absence and presence of  $\beta$ -CD (-/+CD). All values are reported as the mean + std. dev. (n = 3).

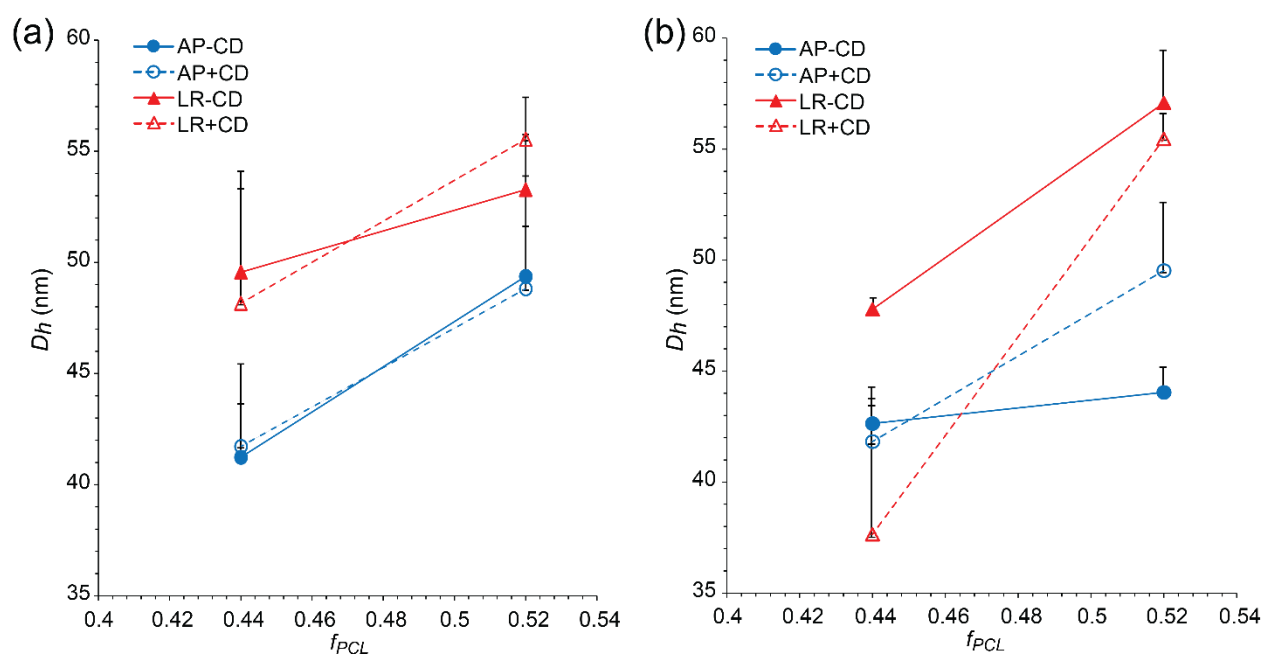

**Figure S22.**  $D_h$  versus  $f_{PCL}$  as determined from number PSDs for (a) gossypol (GP) and (b) phloretin (PH) loaded PEG<sub>10</sub>PCL<sub>10.7</sub> micelles as prepared (AP) and after lyophilization/reconstitution (LR) and in the absence and presence of  $\beta$ -CD (-/+CD). All values are reported as the mean + std. dev. (n = 3).

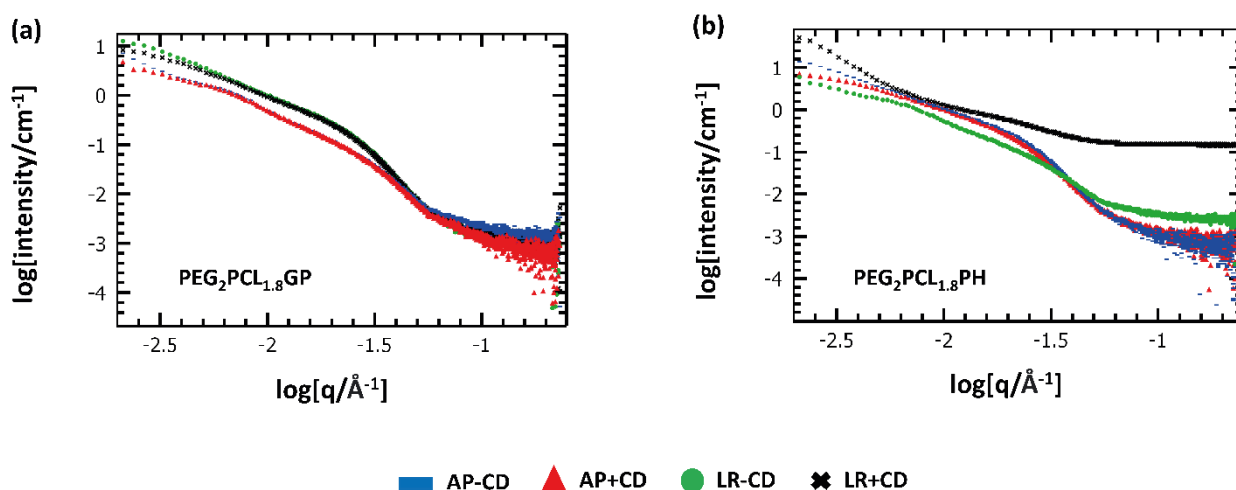

**Figure S23.** SAXS profiles for (a) gossypol and (b) phloretin loaded  $\text{PEG}_2\text{PCL}_{1.8}$  micelles as prepared (AP) and after lyophilization/reconstitution (LR) in the absence and presence of  $\beta$ -CD (-/+CD).

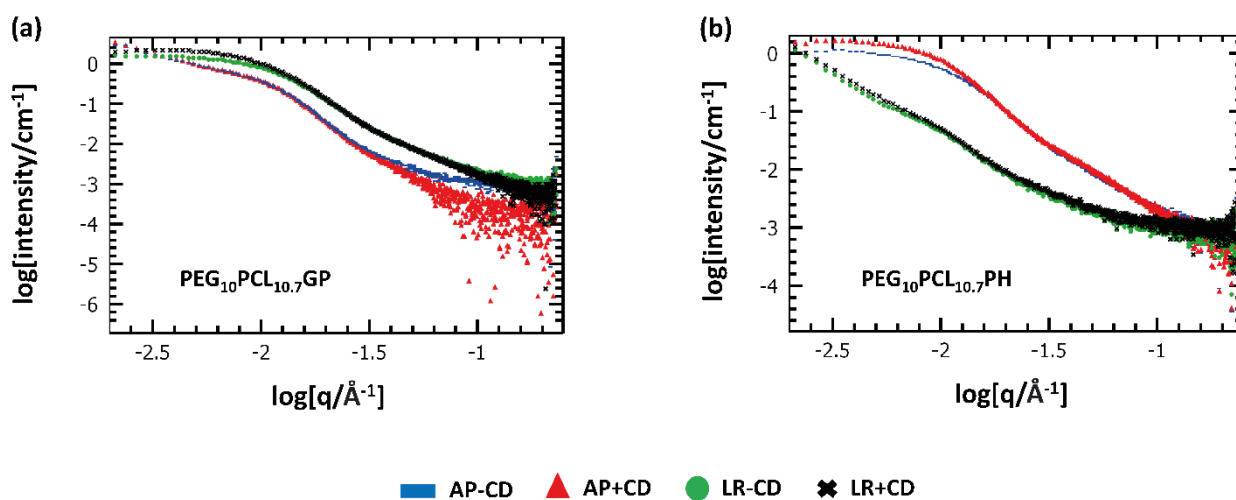

**Figure S24.** SAXS profiles for (a) gossypol and (b) phloretin loaded  $\text{PEG}_{10}\text{PCL}_{10.7}$  micelles as prepared (AP) and after lyophilization/reconstitution (LR) in the absence and presence of  $\beta$ -CD (-/+CD).
